# Supplementary material for: Human Cytomegalovirus Nuclear Egress Complex Subunit, UL53, Associates with Capsids and Myosin Va, but Is Not Important for Capsid Localization towards the Nuclear Periphery
Source: MDPI journal article supplement (doi:10.3390/v14030479), 2022-02-26
Supplement: s1 [file s1]

**Table S1**  
**Viral Proteins Detected in FLAG-Immunoprecipitates from Nuclear Lysates**  
**of Cells Infected with 53-F, but not Wild-Type HCMV**

| <b>Molecular weight band</b> | <b># of peptides</b> | <b>Viral protein</b> | <b>Viral protein function</b> | <b>Coverage (% of total amino acids)</b> |
|------------------------------|----------------------|----------------------|-------------------------------|------------------------------------------|
| 150-250kD                    | 6                    | MCP                  | Major capsid protein          | 6                                        |
| 100-150kD                    | 19                   | MCP                  | Major capsid protein          | 19                                       |
|                              | 9                    | TRS1                 | Capsid assembly               | 9                                        |
|                              | 7                    | pp150                | Tegument protein              | 7                                        |
|                              | 7                    | UL50                 | NEC subunit                   | 7                                        |
|                              | 7                    | UL56                 | Terminase subunit             | 7                                        |
|                              | 6                    | UL89                 | Terminase subunit             | 6                                        |
| 75-100kD                     | 15                   | UL104                | Capsid portal protein         | 21.9                                     |
|                              | 11                   | UL89                 | Terminase subunit             | 15.4                                     |
|                              | 11                   | UL25                 | Tegument protein              | 20.1                                     |
|                              | 10                   | UL50                 | NEC subunit                   | 24.9                                     |
|                              | 5                    | US23                 | Tegument protein              | 7.9                                      |
|                              | 4                    | TRS1                 | Capsid assembly               | 4.7                                      |
|                              | 3                    | pp65                 | Tegument protein              | 6.1                                      |
|                              | 2                    | UL97                 | Ser/Thr kinase                | 4.4                                      |
| 50-75kD                      | 8                    | pp65                 | Tegument protein              | 24.3                                     |
|                              | 2                    | UL50                 | NEC subunit                   | 6.2                                      |
| 30-50kD                      | 17                   | UL53                 | NEC subunit                   | 31.9                                     |
|                              | 17                   | UL50                 | NEC subunit                   | 39.8                                     |
|                              | 8                    | UL44                 | Processivity factor           | 19.9                                     |
|                              | 17                   | UL53                 | NEC subunit                   | 31.9                                     |
|                              | 17                   | UL50                 | NEC subunit                   | 39.8                                     |

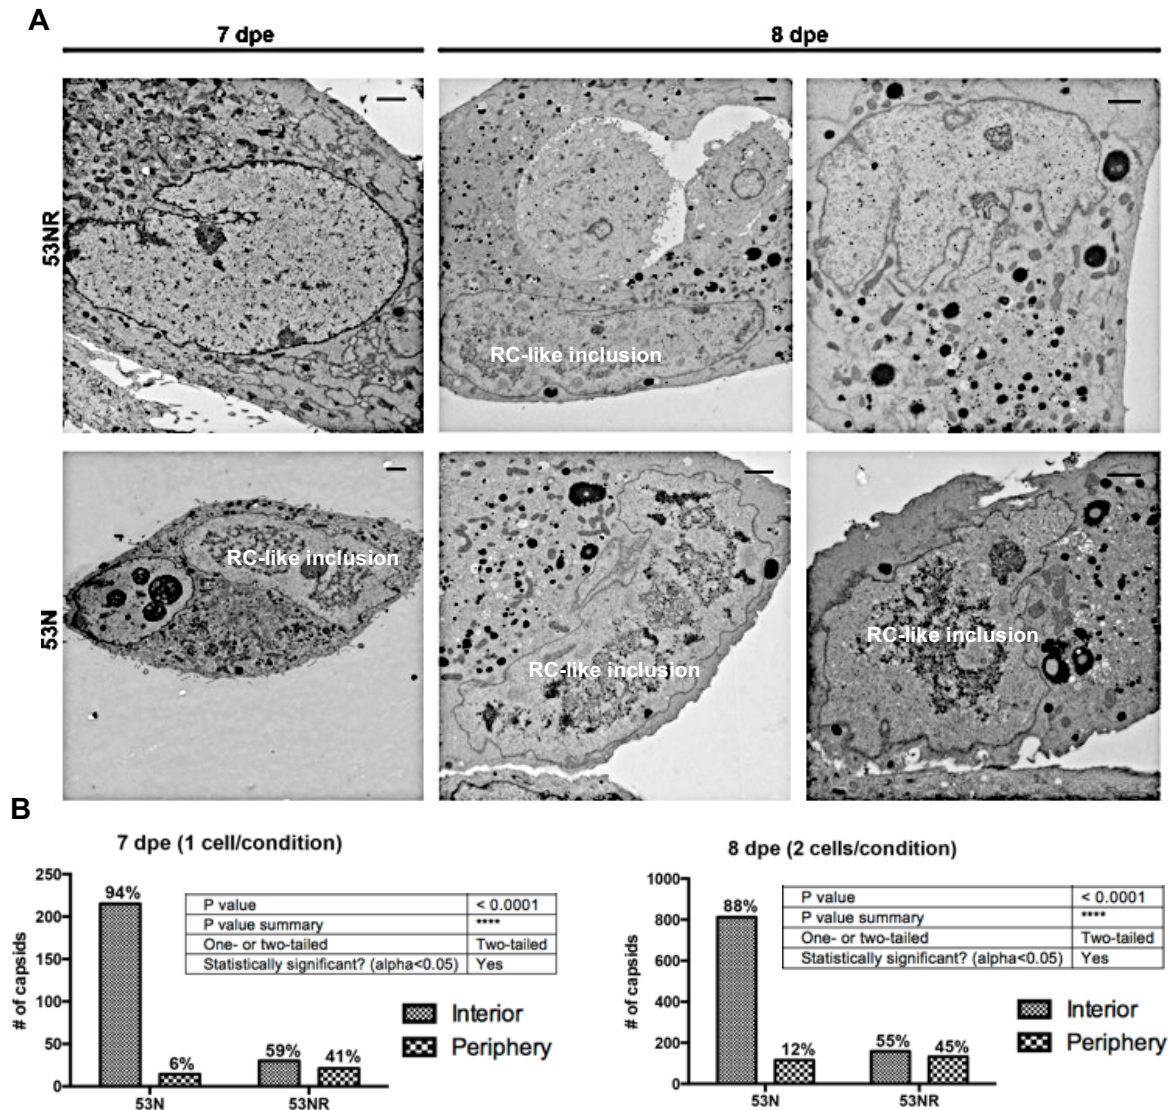

**Figure S1: CLEM analysis of intranuclear distribution of capsids.** HFFs were electroporated with 53N or 53NR HCMV BAC DNA, fixed at 7 or 8 dpe, and processed for CLEM. The percentage of capsids located within  $2\mu\text{m}$  of the nuclear rim was calculated (scale bars are  $2\mu\text{m}$ ). (A) Shows micrographs of whole cell sections of each cell analyzed. The pair of cells from 7 dpe are also shown in Fig 2 from [10]. (B) Shows capsid counts and statistical calculations using Fisher's exact test.
